# Supplementary material for: A Multicenter Before-After Study on Reducing Unnecessary Diagnostics by Changing the Attitude of Caregivers: Protocol for the RODEO Project
Source: PubMed Central journal article supplement (PMC6123537; doi:10.2196/10473), 2018-08-21
Supplement: resprot_v7i8e10473_app1.pdf [file resprot_v7i8e10473_app1.pdf]

**Program launching conference RODEO project**  
***Thursday September 29th, 2016***  
**Location: Olympic Stadium Amsterdam**

|             |                                                                                                                  |
|-------------|------------------------------------------------------------------------------------------------------------------|
| 12.00-13.00 | Lunch                                                                                                            |
| 13.00-13.30 | Introduction by coordinating project team                                                                        |
| 13.30-14.15 | Introductory presentation by participating project teams (5 – 6 minutes per project team)                        |
| 14.15-14.45 | Brainstorm by project team members within their own discipline: assessment of foreseen barriers and facilitators |
| 14.45-15.15 | Developing a plan for reduction by each project team                                                             |
| 15.15-15.45 | <i>Coffee break</i>                                                                                              |
| 15.45-16.45 | Presentation of developed plan for reduction by each project team (8 minutes per project team)                   |
| 16.45-18.00 | Discussion                                                                                                       |

**Program second conference RODEO project**  
**Wednesday March 22th, 2017**  
**Location: VU University Medical Center**

|             |                                                                                                                                                                                  |
|-------------|----------------------------------------------------------------------------------------------------------------------------------------------------------------------------------|
| 17.30-18.00 | <i>Dinner</i>                                                                                                                                                                    |
| 18.00-18.10 | Introduction                                                                                                                                                                     |
| 18.10-18.50 | Presentation of current situation by participating project teams (10 minutes per project team)                                                                                   |
| 18.50-19.00 | Presentation on national initiative aiming to integrate cost-consciousness into resident training programs (“Bewustzijnsproject”)                                                |
| 19.00-19.10 | <i>Coffee break</i>                                                                                                                                                              |
| 19.10-19.40 | Brainstorm by project team members within their own discipline: <ul style="list-style-type: none"><li>• Do's and Don'ts</li><li>• Points of concern for sustainability</li></ul> |
| 19.45-20.00 | Follow-up agreements                                                                                                                                                             |
| 20.00       | Discussion                                                                                                                                                                       |

## **Program third conference RODEO project**

***Wednesday December 13th, 2017***

**Location: VU University Medical Center**

|             |                                                                                                                                                                                               |
|-------------|-----------------------------------------------------------------------------------------------------------------------------------------------------------------------------------------------|
| 17.30-18.00 | <i>Dinner</i>                                                                                                                                                                                 |
| 18.00-18.10 | Introduction                                                                                                                                                                                  |
| 18.10-19.10 | Presentation of current situation by participating project teams (10 minutes per project team)                                                                                                |
| 19.10-19.30 | <i>Coffee break</i>                                                                                                                                                                           |
| 19.30-20.30 | Learned lessons: what works, what doesn't work? <ul style="list-style-type: none"><li>• Education</li><li>• Time limits, protocols and agreements</li><li>• Preliminary conclusions</li></ul> |
| 20.30-20.45 | Publication of results and experiences<br>Discussion                                                                                                                                          |
